# Supplementary material for: Oral Contraceptives Impair Complex Emotion Recognition in Healthy Women
Source: Front Neurosci. 2019 Feb 11;12:1041. doi: 10.3389/fnins.2018.01041 (PMC6378414; doi:10.3389/fnins.2018.01041)
Supplement: Supplementary file 1 [file Table_1.docx]

***Supplementary Material***

**Oral contraceptives impair complex emotion recognition in healthy women**

**Rike Pahnke1; Anett Mau-Moeller1,2, PhD; Martin Junge3, PhD; Julia Wendt4, PhD; Mathias Weymar5, PhD; Alfons O. Hamm4, PhD & Alexander Lischke4, PhD**

1Department of Sport Science, University of Rostock, Rostock, Germany
2Department of Orthopaedics, University Medicine Rostock, Rostock, Germany
3Institute for Community Medicine, University Medicine Greifswald, Greifswald, Germany
4Department of Psychology, University of Greifswald, Greifswald, Germany
5Department of Psychology, University of Potsdam, Potsdam, Germany

**Corresponding author:**

Alexander Lischke, Department of Psychology, University of Greifswald, Franz-Mehring-Str. 47, D-17487 Greifswald, Germany.Email: [alexander.lischke@uni-greifswald.de](mailto:alexander.lischke@uni-greifswald.de)

**Supplementary Material**

We performed several analyses to investigate whether there were any differences in valence- or difficulty-dependent emotion recognition between participants that used OCs with androgenic or anti-androgenic properties (see Table S1).

A mixed-design ANOVA revealed no differences in valence-dependent emotion recognition between participants that used androgenic or anti-androgenic OCs [effect of group: *F*(1,93) = 6.51, *p* = .012, *η2p* = 0.07; effect of valence: *F*(1.70,157.71) = 8.56, p *<* .001, *η2p* = 0.08; interaction of group and valence: *F*(1.70, 157.71) = 0.29, *p* = .712, *η2p* = 0.00, f = 0.05]. Across all participants, recognition accuracy was lowest for negative as compared to positive or neutral expressions as indicated by post hoc tests [negative vs. positive: *p* < .001; negative vs. neutral: *p* < .001; positive vs. neutral: *p* = .203].

There were also no differences in difficulty-dependent emotion recognition between participants that used androgenic or anti-androgenic OCs as indicated by another mixed design ANOVA [effect of group: *F*(1,93) = 7.52, p = .007, *η2p* = 0.08; effect of difficulty: *F*(1,93) = 256.00, *p* < .001, *η2p* = 0.73; interaction of group and valence: *F*(1,93) = 5.71, *p* = .010, *η2p* = 0.06]. Across all participants, recognition accuracy was lower for difficult than easy expressions.

As there were no differences in valence- or difficulty-dependent emotion recognition between participants that used androgenic or anti-androgenic OCs, we refrained from differentiating between these participants in our main analyses.

**Table S1**

*Emotion recognition*

|  | | OC-AP  (*n* = 21) | |  | OC-AAP  (*n* = 21) | |  |
| --- | --- | --- | --- | --- | --- | --- | --- |
|  | | *M* | *SD* |  | *M* | *SD* |  |
| Valence-dependent emotion recognition (RMET) | |  |  |  |  |  |  |
|  | Positive expressions | 0.73 | 0.17 |  | 0.74 | 0.13 |  |
|  | Negative expressions | 0.64 | 0.16 |  | 0.63 | 0.19 |  |
|  | Neutral expressions | 0.69 | 0.11 |  | 0.69 | 0.12 |  |
| Difficulty-dependent emotion recognition (RMET) | |  |  |  |  |  |  |
|  | Easy expressions | 0.78 | 0.10 |  | 0.82 | 0.08 |  |
|  | Difficult expressions | 0.58 | 0.10 |  | 0.54 | 0.14 |  |
| *Note.* OC-AP = women with androgenic oral contraceptive use, OC-AAP = women with anti-androgenic oral contraceptive use, RMET = Reading the Mind in the Eyes Test ([Baron-Cohen et al., 2001](#_ENREF_4)). | | | | | | | |
